# Supplementary material
Source: publisher figshare collection journal article supplement (https://karger.figshare.com/articles/dataset/_/6269738)
Supplement: Supplementary file 1 [file 1]

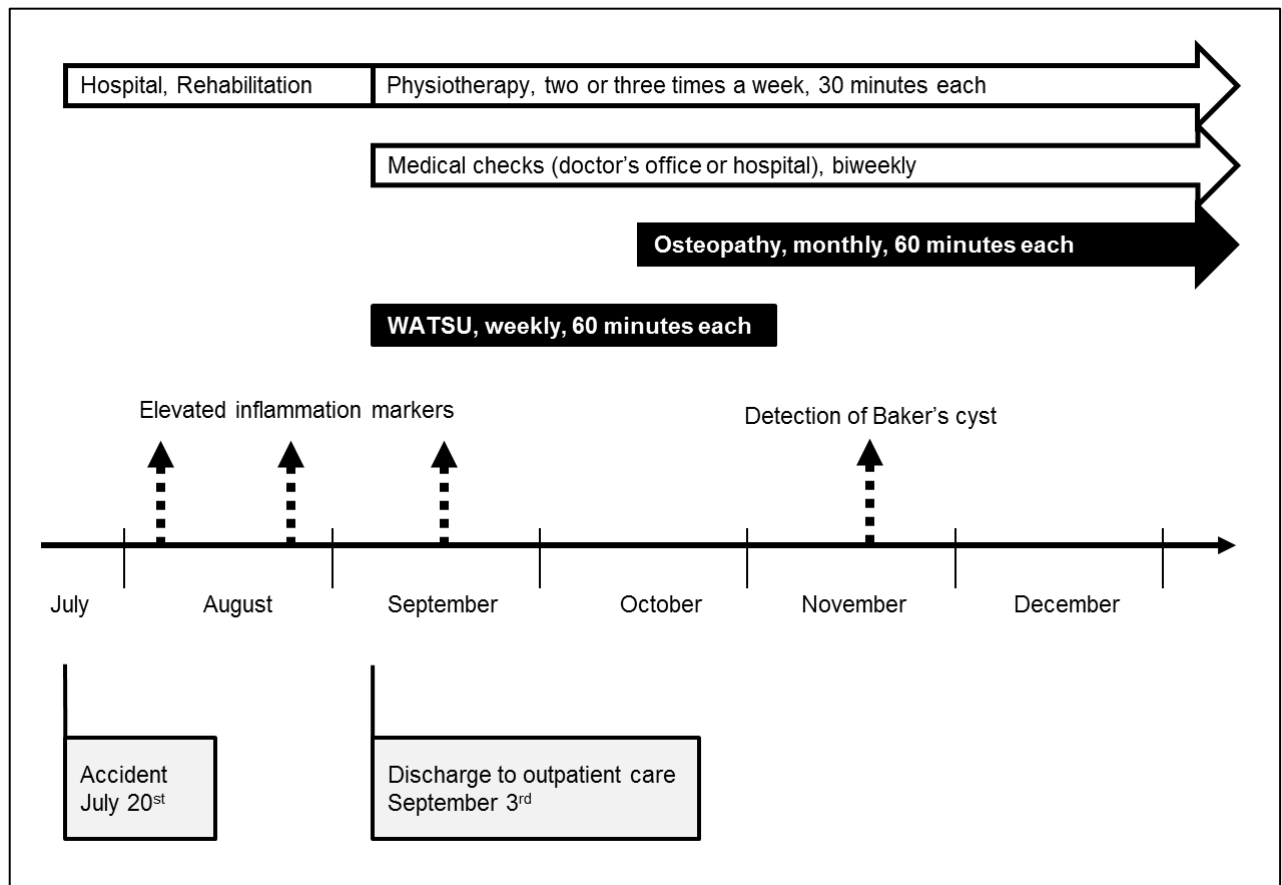

**Online Suppl. Fig. 1.** Timeline illustrating the first half-year after the accident. Conventional medical interventions are colored white, while therapies that were added independently by the patient are colored black, and complications are marked with dotted lines.
